# Supplementary material for: CpG hypomethylation at proximal promoter and 5’UTR along with IL6 signaling loop associates with MYD88 upregulation in epithelial ovarian cancer
Source: PubMed Central journal article supplement — Sci Rep. 2024 Dec 28;14:30945. doi: 10.1038/s41598-024-81975-x (PMC11681154; doi:10.1038/s41598-024-81975-x), 2024-12-28
Supplement: 41598_2024_81975_MOESM1_ESM.pdf [file 41598_2024_81975_MOESM1_ESM.pdf]

Supplementary Figure 1

→ A: A2780  
→ O: OVCAR3

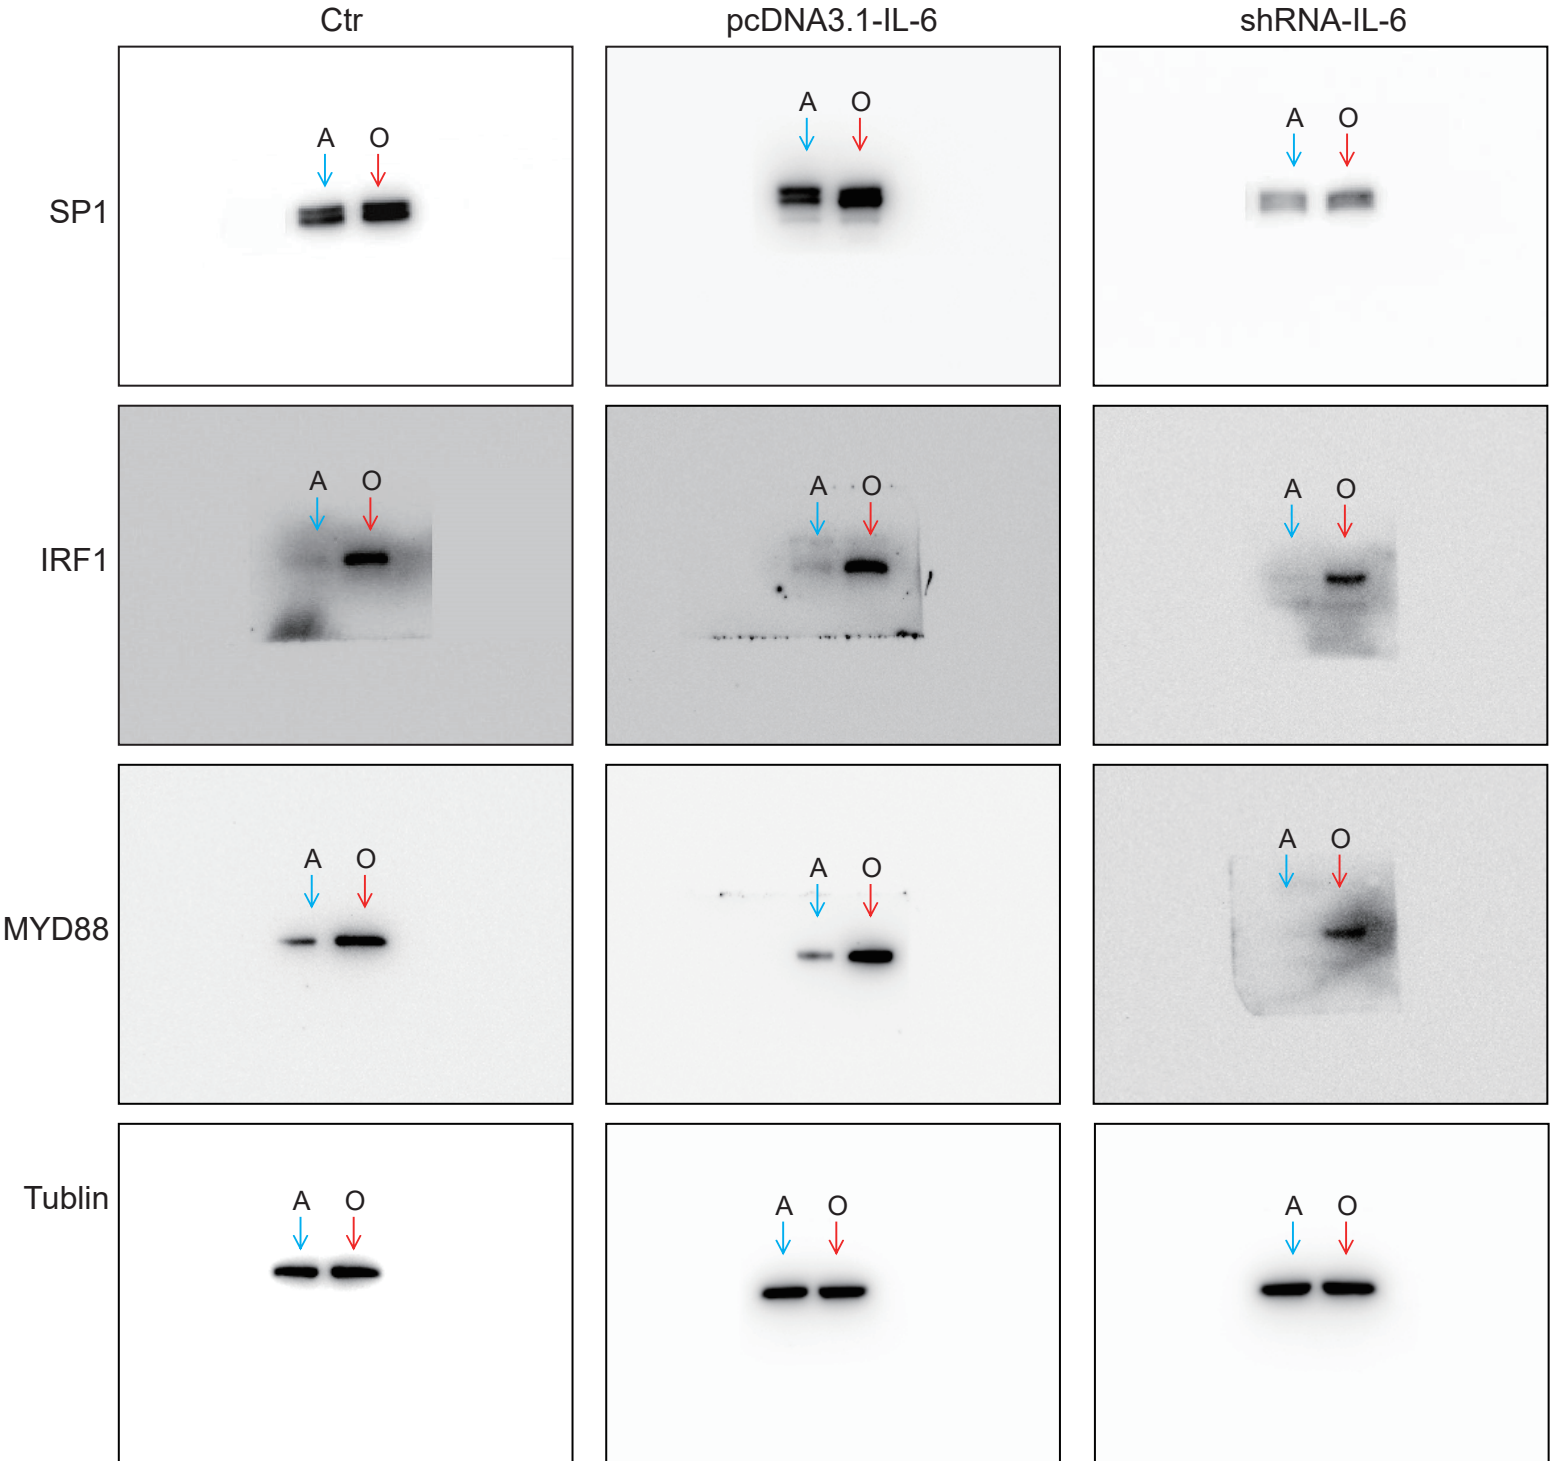

## Supplementary Figure 2

- +Anti-IL-6 0  $\mu\text{mol/L}$
- +Anti-IL-6 10  $\mu\text{mol/L}$
- +Anti-IL-6 100  $\mu\text{mol/L}$

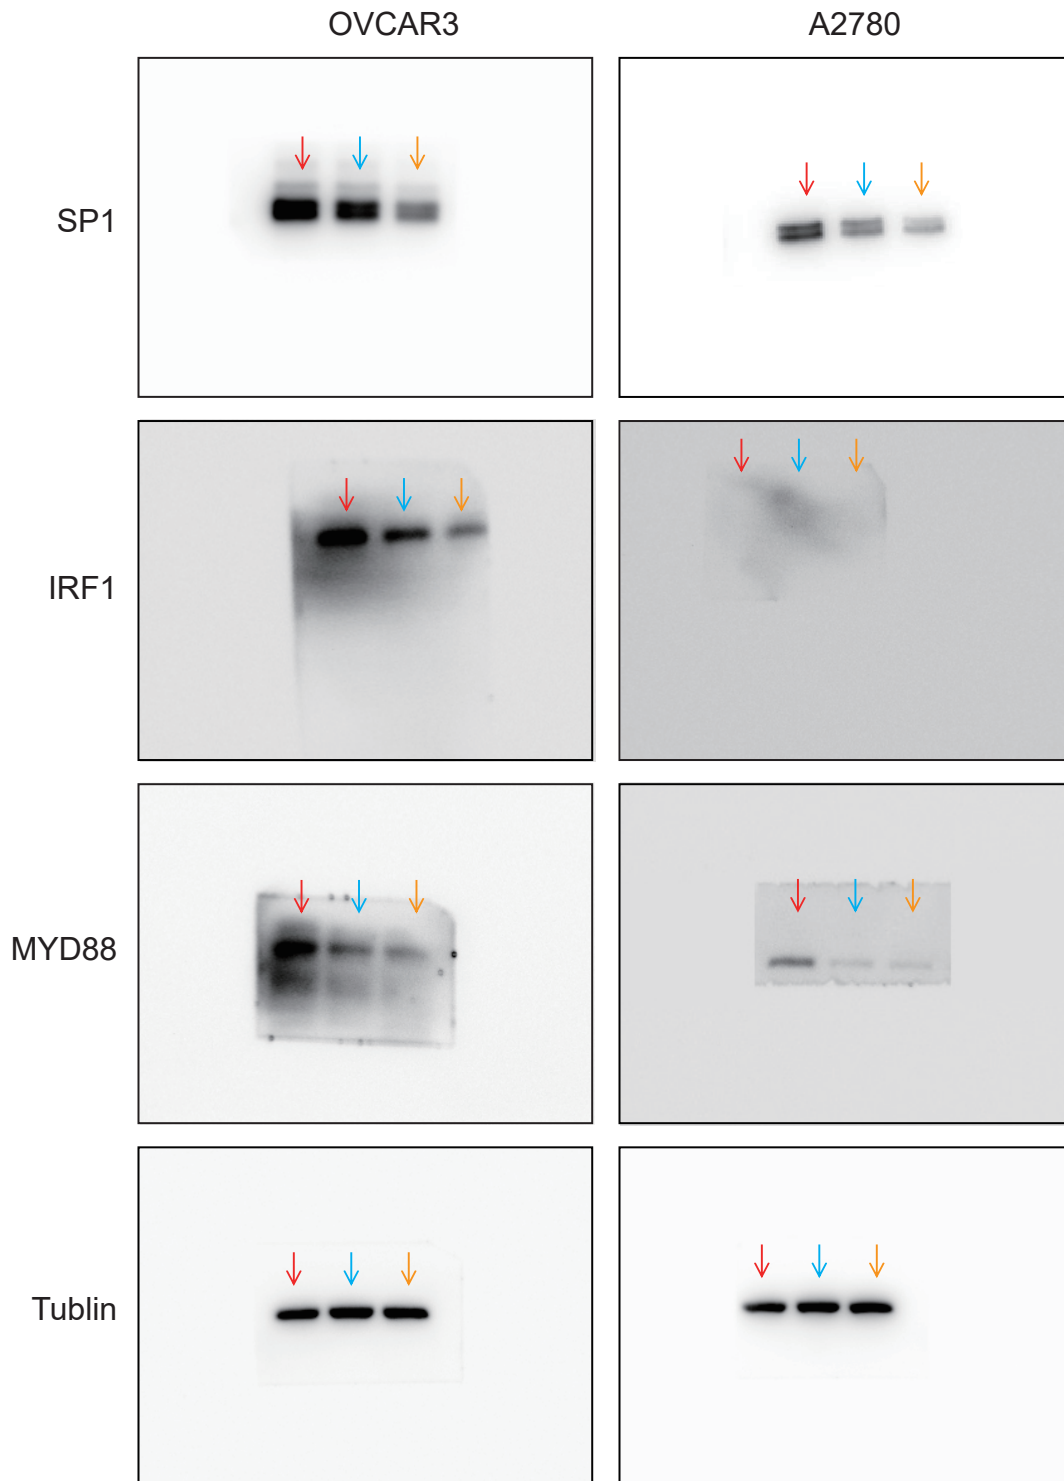

Original images of western blots

The grouping of blots were cropped from different parts of the same gel.

These cropped blots are used in the main figure.

Expression levels of SP1, IRF1 and MYD88 were assayed with western blot, respectively.

Tublin was used as loading internal control. All gels are 10%.
