# Supplementary material for: CpG hypomethylation at proximal promoter and 5’UTR along with IL6 signaling loop associates with MYD88 upregulation in epithelial ovarian cancer
Source: PubMed Central journal article supplement — Sci Rep. 2024 Dec 28;14:30945. doi: 10.1038/s41598-024-81975-x (PMC11681154; doi:10.1038/s41598-024-81975-x), 2024-12-28
Supplement: 41598_2024_81975_MOESM2_ESM.pdf [file 41598_2024_81975_MOESM2_ESM.pdf]

## Abbreviations

|                |                                                    |
|----------------|----------------------------------------------------|
| MYD88          | Myeloid Differentiation Factor 88                  |
| EOC            | Epithelial ovarian cancer                          |
| IL-6           | Interleukin-6                                      |
| 5'URR          | 5'upstreaaam regulatory region                     |
| 5'UTR          | 5'untranslated region                              |
| TLR4           | Toll-like receptor 4                               |
| IL-1R          | Interleukin-1 receptor                             |
| NF- $\kappa$ B | Nuclear factor-kappa B                             |
| CpG            | cytosine-guanine dinucleotide                      |
| TF             | Transcription factor                               |
| STAT3          | Signal transducer and activator of transcription 3 |
| SP1            | Specificity protein 1                              |
| IRF1           | Interferon regulatory factor 1                     |
| FCS            | Fetal calf serum                                   |
| TPM            | Transcripts per kilobase million                   |
| qPCR           | quantitative polymerase chain reaction             |
| BSP            | Bisulfite sequencing PCR                           |
| PFS            | Progression-free survival                          |
| OS             | Overall survival                                   |
